# Supplementary material for: Surface wettability guiding in situ cultivation engineering of hollow polymer nanospheres for persistent efficient uranium extraction
Source: Royal Society of Chemistry journal article supplement (doi:10.1039/d3ta05394f), 2023-01-01
Supplement: d3ta05394f1.pdf [file d3ta05394f1.pdf]

## Supporting Information

### **Surface Wettability Guiding In-situ Cultivation Engineering of Hollow Polymer Nanospheres for Persistent Efficient Uranium Extraction**

Fan Wu, Hao Li,\* Jing Tang, Abdul Haleem, Jianming Pan\*

School of Chemistry and Chemical Engineering, Jiangsu University, Zhenjiang 212013, Jiangsu,

China. E-mail: haoli5385@ujs.edu.cn; pjm@ujs.edu.cn.

### Formulas in the adsorption experiments:

The following lists the equations of pseudo-first-order (S1), pseudo-second-order (S2) [1].

$$Q_t = Q_e - Q_e e^{-k_1 t} \quad \#S1$$

$$Q_t = \frac{k_2 Q_e^2 t}{1 + k_2 Q_e t} \quad \#S2$$

$Q_e$  (mg g<sup>-1</sup>) is the adsorption capacity at equilibrium,  $Q_t$  (mg g<sup>-1</sup>) is the adsorption capacity at time  $t$ ,  $k_1$  (min<sup>-1</sup>) and  $k_2$  (g mg<sup>-1</sup> min<sup>-1</sup>) are adsorption rate constant respectively.

Langmuir (S3) and Freundlich (S4) isotherm models [2]:

$$Q_e = \frac{K_L Q_m C_e}{1 + K_L C_e} \quad \#S3$$

$$Q_e = K_F C_e^{1/n} \quad \#S4$$

$Q_m$  (mg g<sup>-1</sup>) is the maximum adsorption capacity.  $K_L$  (L mg<sup>-1</sup>) and  $K_F$  (mg L<sup>-1</sup>) are the adsorption constants of Langmuir and Freundlich equations, respectively.  $1/n$  is the adsorption strength.

Thermodynamic parameters such as enthalpy change ( $\Delta H$ , kJ mol<sup>-1</sup>), entropy change ( $\Delta S$ , J mol<sup>-1</sup> K<sup>-1</sup>) and Gibbs free energy change ( $\Delta G$ , kJ mol<sup>-1</sup>) are calculated by following equations [3]:

$$K_d = \frac{(C_0 - C_e)V}{mC_e} \quad \#S5$$

$$\Delta G = -RT \ln K \quad \#S6$$

$$\ln K = \frac{\Delta S}{R} - \frac{\Delta H}{RT} \quad \#S7$$

Here  $K_d$  is the distribution coefficient, and  $R$  is the universal gas constant (8.314 J·K<sup>-1</sup>·mol<sup>-1</sup>).

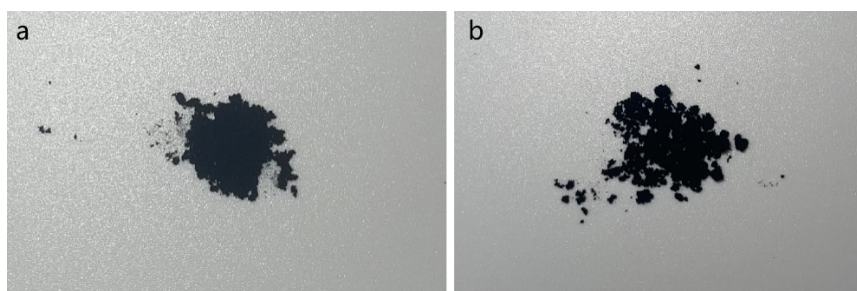

**Fig. S1** The macroscopic photos of m-CNTs (a) and m-CNTs@H-PDA-AO (b)

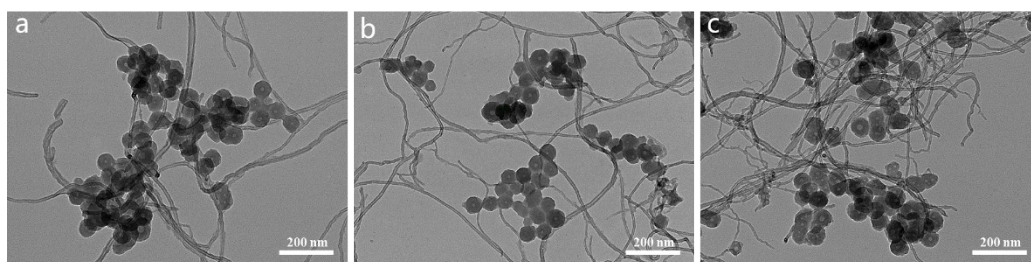

**Fig. S2** The TEM images of CNTs@H-PDA after treatments with 100 °C hot water (a), 0.1 M HNO<sub>3</sub> (b), and pH 9.0 NaOH solution (c) for 1.0 h

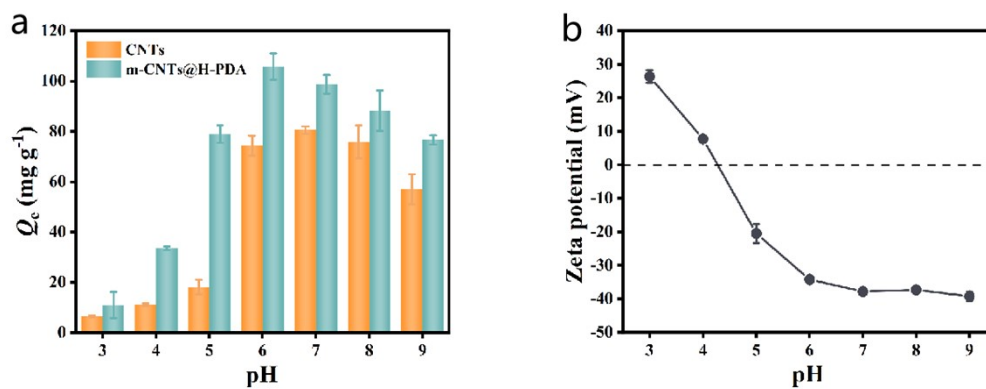

**Fig. S3** The effect of initial pH of solution on adsorption of m-CNTs and m-CNTs@H-PDA (a) ( $C_0 = 10 \text{ mg L}^{-1}$ ,  $V = 50 \text{ mL}$ ,  $T = 298 \text{ K}$ ,  $m = 2.0 \text{ mg}$ ,  $t = 60 \text{ min}$ ,  $\text{pH} = 3.0\text{-}9.0$ ); The Zeta potential values of m-CNTs@H-PDA in aqueous solutions at different pH values (b)

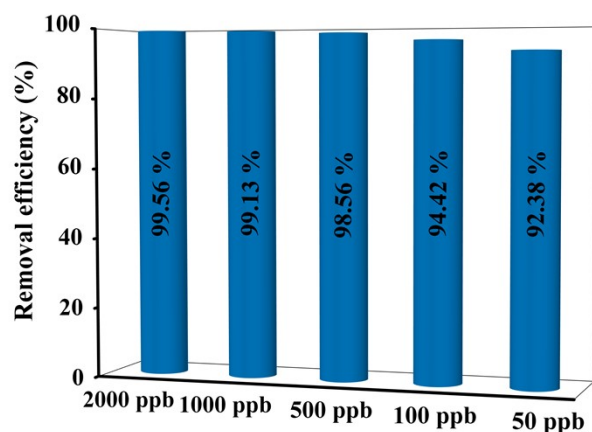

**Fig. S4** Removal efficiency of m-CNTs@H-PDA-AO toward uranium with different concentrations (pH=8).

**Table S1** The fitting parameters of adsorption kinetics models of m-CNTs@H-PDA-AO for uranyl ion at different solution volumes

| Sorbent         | V (mL) | Pseudo-first-order              |                            |       | Pseudo-second-order             |                                               |       |
|-----------------|--------|---------------------------------|----------------------------|-------|---------------------------------|-----------------------------------------------|-------|
|                 |        | $Q_{e,c}$ (mg g <sup>-1</sup> ) | $k_1$ (min <sup>-1</sup> ) | $R^2$ | $Q_{e,c}$ (mg g <sup>-1</sup> ) | $k_2$ (g mg <sup>-1</sup> min <sup>-1</sup> ) | $R^2$ |
| m-CNTs@H-PDA-AO | 10     | 52.75                           | 0.39                       | 0.812 | 53.61                           | 0.0210                                        | 0.964 |
|                 | 50     | 154.20                          | 0.16                       | 0.982 | 174.20                          | 0.0012                                        | 0.992 |

$Q_{e,c}$  (mg g<sup>-1</sup>) is the kinetic equation fitting calculated value

**Table S2** The fitting parameters of the adsorption equilibrium model of m-CNTs@H-PDA-AO for uranyl ion at different temperatures

| T (K) | Langmuir isotherm model            |                                |       | Freundlich isotherm model                                    |       |       |
|-------|------------------------------------|--------------------------------|-------|--------------------------------------------------------------|-------|-------|
|       | $Q_{max}$<br>(mg g <sup>-1</sup> ) | $k_L$<br>(L mg <sup>-1</sup> ) | $R^2$ | $k_f$<br>(mg <sup>1-n</sup> g <sup>-1</sup> L <sup>n</sup> ) | $1/n$ | $R^2$ |
| 288   | 307.10                             | 0.30                           | 0.783 | 121.80                                                       | 0.23  | 0.961 |
| 298   | 381.98                             | 0.28                           | 0.803 | 138.90                                                       | 0.26  | 0.977 |
| 308   | 931.30                             | 0.07                           | 0.875 | 154.70                                                       | 0.41  | 0.975 |

**Table S3** The thermodynamic parameters for uranyl ion on m-CNTs@H-PDA-AO

| $T$ (K) | $\text{Ln}K$ | $\Delta G$ (kJ mol <sup>-1</sup> ) | $\Delta H$ (kJ mol <sup>-1</sup> ) | $\Delta S$ (J mol <sup>-1</sup> K <sup>-1</sup> ) |
|---------|--------------|------------------------------------|------------------------------------|---------------------------------------------------|
| 288     | 1.3573       | -3.25                              |                                    |                                                   |
| 298     | 1.4348       | -3.55                              | 8.36                               | 40.20                                             |
| 308     | 1.5849       | -4.06                              |                                    |                                                   |

**Table S4** Initial concentration ( $C_0$ ), Equilibrium Concentration ( $C_e$ ) and Removal Efficiency ( $E_a$ ) of uranyl ion and other metal ions

| Ions        | UO <sub>2</sub> <sup>2+</sup> | Fe <sup>3+</sup> | Ni <sup>2+</sup> | Pb <sup>2+</sup> | Co <sup>2+</sup> | VO <sub>3</sub> <sup>-</sup> | K <sup>+</sup>       | Ca <sup>2+</sup>     | Mg <sup>2+</sup>     | Na <sup>+</sup>       |
|-------------|-------------------------------|------------------|------------------|------------------|------------------|------------------------------|----------------------|----------------------|----------------------|-----------------------|
| $C_0$ (ppb) | 330                           | 170              | 90               | 73               | 6.0              | 282                          | 0.65*10 <sup>6</sup> | 0.92*10 <sup>6</sup> | 1.22*10 <sup>6</sup> | 10.26*10 <sup>6</sup> |
| $C_e$ (ppb) | 50.94                         | 58.09            | 40.87            | 35.28            | 3.78             | 277                          | 0.65*10 <sup>6</sup> | 0.92*10 <sup>6</sup> | 1.22*10 <sup>6</sup> | 10.26*10 <sup>6</sup> |
| $E_a$ (%)   | 84.56%                        | 65.83%           | 54.59%           | 51.67%           | 37%              | 1.77%                        | 0                    | 0                    | 0                    | 0                     |

## References

- [1] F. Wu, H. Li, Y. Pan, Y. Sun, J. Pan, 2023. Bioinspired construction of magnetic nano stirring rods with radially aligned dual mesopores and intrinsic rapid adsorption of palladium, *J. Hazard. Mater.* 441, 129917. <https://doi.org/10.1016/j.jhazmat.2022.129917>.
- [2] X. Bai, Y. Wang, H. Li, X. Tian, Y. Ma, J. Pan, 2021. Stalagmites in karst cave inspired construction: lotus root-type adsorbent with porous surface derived from CO<sub>2</sub>-in-water Pickering emulsion for selective and ultrafast uranium extraction, *J. Hazard. Mater.* 419, 126398. <https://doi.org/10.1016/j.jhazmat.2021.126398>.
- [3] J.L. Tang, J.L. Zhao, S.X. Wang, L.B. Zhang, M.H. Zhao, Z. Huang, Y.T. Hu, 2021. Pre-modification strategy to prepare a novel Zr-based MOF for selective adsorption of Palladium(II) from solution, *Chem. Eng. J.* 407, 127223. <https://doi.org/10.1016/j.cej.2020.127223>.
